# Supplementary material
Source: PubMed Central journal article supplement (PMC5054574)
Supplement: CEI-186-144-s001.pdf [file CEI-186-144-s001.pdf]

Supplementary Figure 1

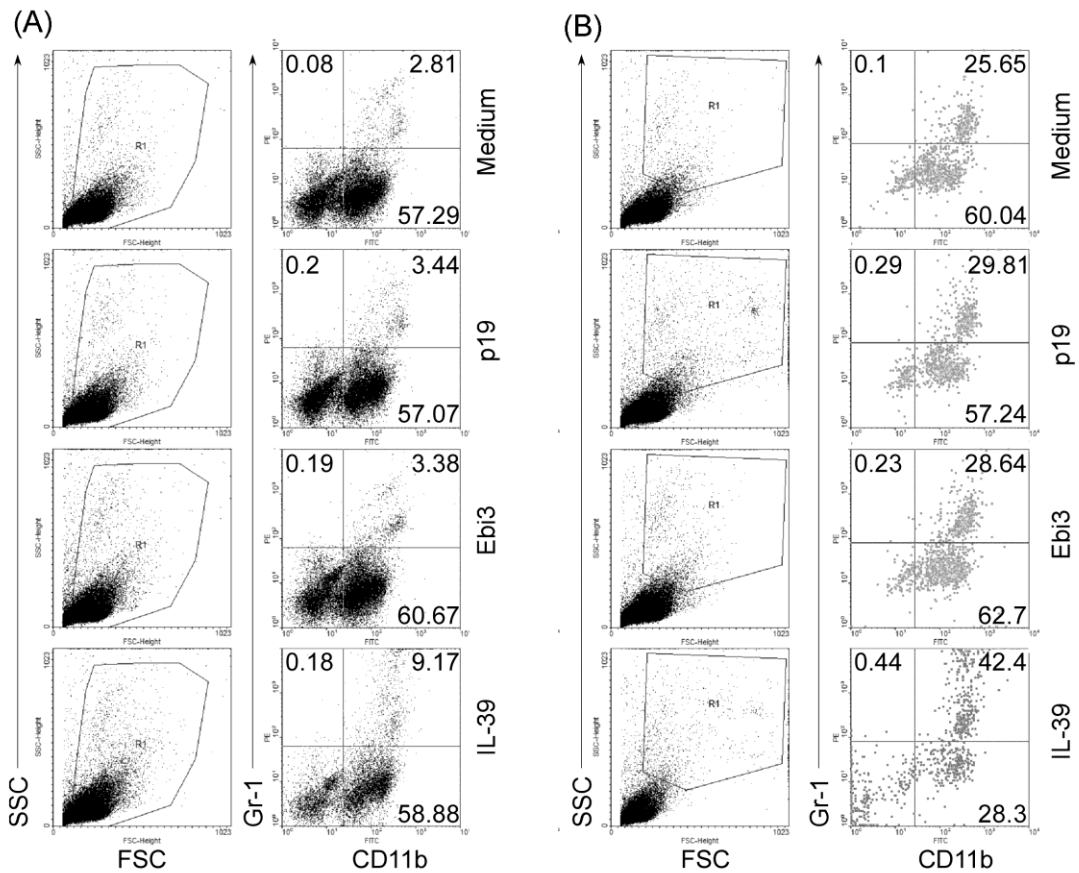

**Supplementary Figure 1. Gating strategy for IL-39-expanded/induced neutrophils.** Splenocytes were separated from 8-week-old C57BL/6 mice and red blood cells were lysed using 1 x lysis buffer. Cells were washed and cultured for 3 days in the presence of medium, 50 ng/ml p19, Ebi3, or IL-39 and analyzed by FACS. All live cells **(A)** or large granule cells **(B)** were gated and the percentages of Gr-1<sup>+</sup>CD11b<sup>+</sup> neutrophils are shown. Unless otherwise stated in other specific procedures, neutrophils were analyzed by gating all live cells **(A)**.

Supplementary Figure 2

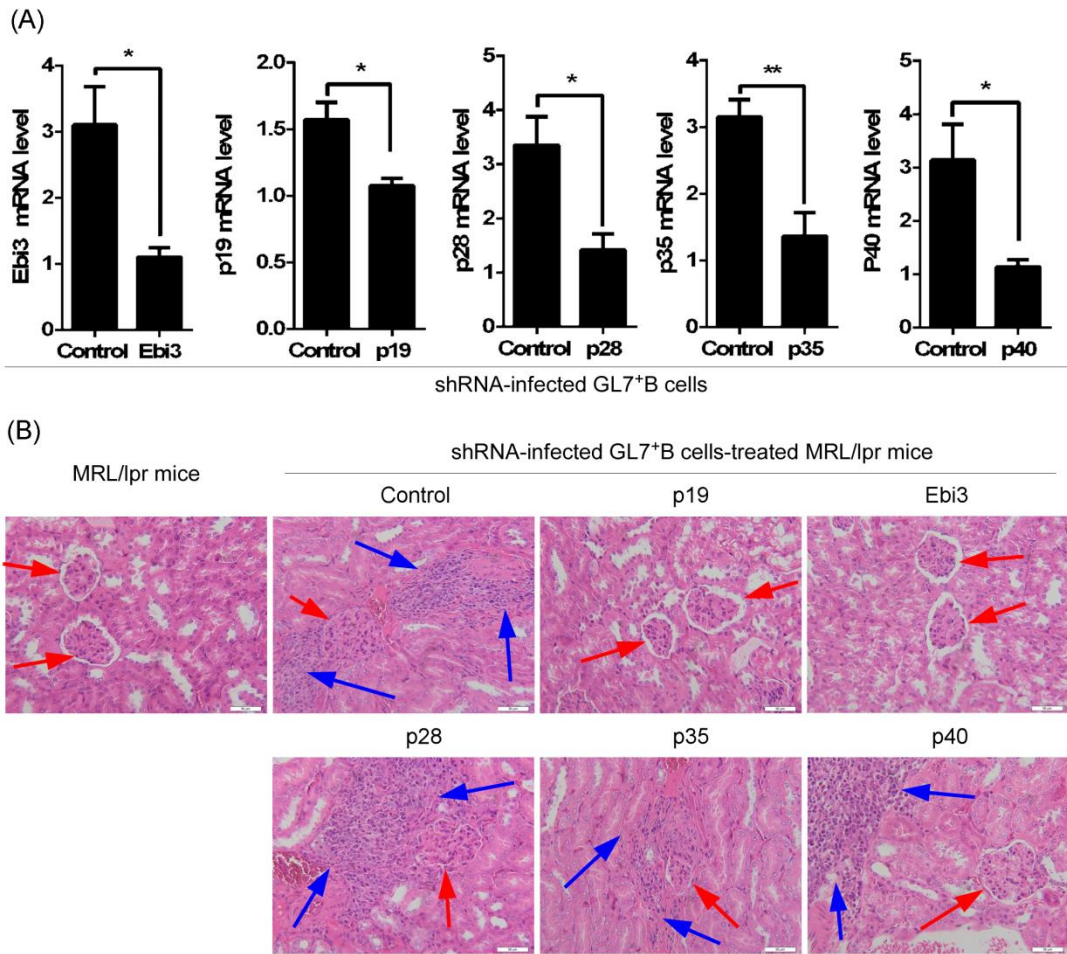

**Supplementary Figure 2. IL-39-deficiency reduced GL7<sup>+</sup>B-induced inflammatory cells infiltration into the kidney of lupus-prone MRL/lpr mice.** GL7<sup>+</sup>B cells from 8-month-old female lupus-prone MRL/lpr mice were sorted by FACS and infected with control shRNA or IL-12 family subunits p28, p35 or p40, p19 or Ebi3-specific shRNA. On day 1 after infection, (A) p28, p35, p40, p19 and Ebi3 mRNA expression were analyzed by qPCR; (B) 5 X 10<sup>6</sup> control, p28, p35, p40, p19 and Ebi3-specific shRNA-infected GL7<sup>+</sup>B cells per mouse were *i.v.* injected into 8-week-old female lupus-prone MRL/lpr mice (6 mice per group). Two weeks after treatment, kidney sections were stained with H&E. Red arrows show glomeruli; Blue arrows show infiltrating inflammatory cells. Scale bars, 50  $\mu$ M. (A) Data are shown as mean +

SEM (n=6) and are representative of three independent experiments. **(B)** Data represent at least three independent experiments. \* $P < 0.05$ , \*\* $P < 0.01$ , \*\*\* $P < 0.001$ , \*\*\*\* $P < 0.0001$  (two-tailed student's t test).

Supplementary Figure 3

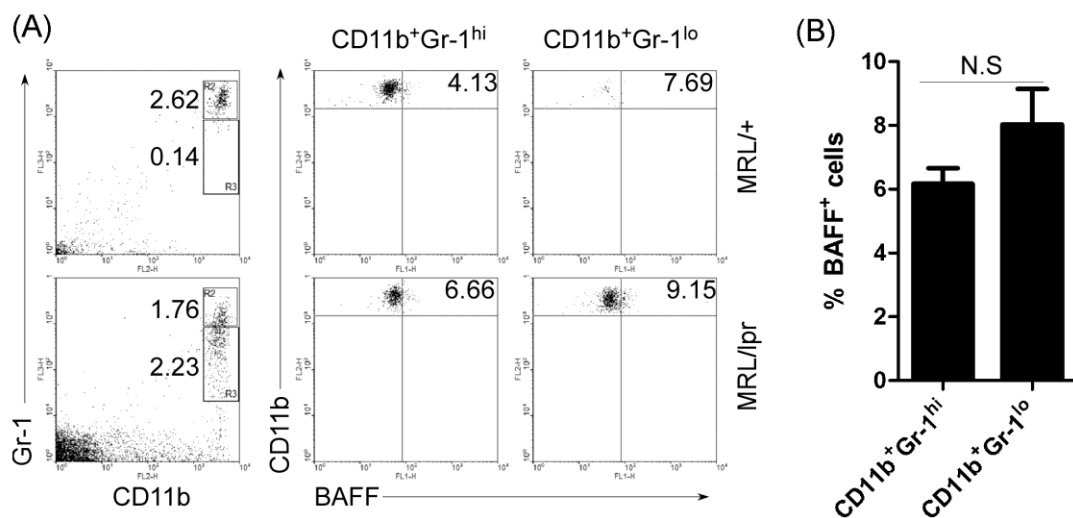

**Supplementary Figure 3. BAFF-expressing CD11b<sup>+</sup>Gr-1<sup>hi</sup> and CD11b<sup>+</sup>Gr-1<sup>lo</sup> cells are similar.** BAFF-expressing CD11b<sup>+</sup>Gr-1<sup>hi</sup> and CD11b<sup>+</sup>Gr-1<sup>lo</sup> cells from the splenocytes of 8-month-old female non-lupus-prone MRL/+ and lupus-prone MRL/lpr mice were analyzed by FACS. **(A)** The percentages of BAFF-expressing CD11b<sup>+</sup>Gr-1<sup>hi</sup> and CD11b<sup>+</sup>Gr-1<sup>lo</sup> neutrophils are shown. **(B)** The statistical analysis of the percentages BAFF-expressing CD11b<sup>+</sup>Gr-1<sup>hi</sup> and CD11b<sup>+</sup>Gr-1<sup>lo</sup> cells from lupus-prone MRL/lpr mice. Results represent at least three independent experiments. N.S represents no significance (two-tailed student's t test). Error bars, s.e.m.
